# Supplementary material for: Abscisic Acid—Defensive Player in Flax Response to Fusarium culmorum Infection
Source: Molecules. 2022 Apr 29;27(9):2833. doi: 10.3390/molecules27092833 (PMC9105474; doi:10.3390/molecules27092833)
Supplement: Supplementary file 1 [file molecules-27-02833-s001.zip › Supplementary File S2.pdf]

Supplementary File S2. List of primers used in the real-time RT-PCR.

- Terpenoid backbone biosynthesis gene primers

| GENE  | FWD PRIMER                    | REV PRIMER                     |
|-------|-------------------------------|--------------------------------|
| ACTIN | CCGGTG TTATGG TTGGAA          | TGTAGA AAGTGT GATGCC AAA       |
| DXS   | CGCTCC TACTCA ATCTTA CAC      | CCGACA TCAAAG CACCT            |
| DXR   | ACTATT TGTTTCG GAGCTG ATTA    | GCCAGG ACATGG TGTAGA           |
| HMGS  | GCAAGG TTGGGC TTGTAA          | GTGTGT ACTGAT AGTGCG G         |
| HMGR  | CCACCA AAGATT CAACAC TC       | GACGTC ATCGGC ATCTC            |
| FPPS  | AGTATA AGACAG CATACT ACT      | AGCAGT CCAGAT AATCAT CC        |
| GPPS  | CTTACC TATACC AAATAG TGTTCC G | TTTAAT GACTTA ATTCCA CGTCTT GT |

- Carotenoid biosynthesis gene primers

| GENE   | FWD PRIMER                  | REV PRIMER                 |
|--------|-----------------------------|----------------------------|
| PSY    | AGGGAT GAGAAT GGACTT GAA    | AGCATT ATAGAC GCTCTC AG    |
| PDS    | GAGGCT CAAGAT GGTCTT AC     | AAGAAA TCGGTT CAAGGC TA    |
| Z-ISO  | CACATA CACTGT GGATGG G      | CTACAC TCGTCC TCTCCT TCA   |
| ZCD    | CCAGAT GCAGAC TTCTCG        | AGAACC TGCTTT GATACT CTATT |
| CRTISO | TTTGAG CATTCC CACAAT ACT    | GCCAAT AATCTC ATCAGC AAC   |
| LCYB   | GCCTTA CGGAAG GGTCAA TA     | ATCGTA ACACCA TCGTTA CAT   |
| LCE    | GCAACT AATGGA CACAGT ATTGTA | CTCAAC CTCCAC ACCATA AG    |
| βHY    | GCGATT GGCCTA TTGTCA T      | GCAGCT ACTTTG CGGAAA TAA   |
| LUT1   | GTCGCT GCACAA GAAGTA T      | GAATTC AACGCG TCGAAA TTA   |
| LUT5   | ACTTTG GGCCAA ATGTCA        | TGATGT TCAAGT GGGCTG       |
| VDE    | GCTCGA GAGAGC AGCTA         | CTTGTC CTTCTA TCTCTT CAACC |
| ZEP    | CTGCTT TGAAG CCATTG         | CGAGTA ACCGGA AGACC        |

- ABA and apocarotenoid biosynthesis gene primers

| GENE  | FWD PRIMER               | REV PRIMER                |
|-------|--------------------------|---------------------------|
| CCD1  | TGCATG ACTTTG CCATTA CTG | TTTGCA TATCGA GGTAAG ACAC |
| CCD7  | CCAGGG TGATGT TTGGG      | ATATCC TCGGCA TTGCAG      |
| CCD8  | AACGAA CGGAAG GTGAT      | GAACTT GTAAAG CGGCGT C    |
| NCED3 | AGAAGC CGTACC TCAAG      | TGCTGA TCCGGA ATCACC A    |
| NCED6 | CTGTCG ATACAC TCGAAC CA  | CGTACT GTCTAA CAACCC G    |

|      |                      |                          |
|------|----------------------|--------------------------|
| ABA2 | ATCGAC ATCCTC GTCAAC | GATGGG ATCATC ACTCTT GC  |
| AAO3 | GTGGAC GTTGAT GTGGAG | GAGTAA GCCAAC AGTGGT TAT |

- Tocopherol biosynthesis gene primers

| GENE | FWD PRIMER                  | REV PRIMER                 |
|------|-----------------------------|----------------------------|
| GGR  | GAAGTC CTCGAT GCTTAC C      | TGCCGT CGTACT CAGTAT       |
| VTE2 | CCTTCC ATTGGC ATCCG         | TGGCAG ATTGAT TGAATA GGC   |
| VTE3 | GCTTAT CATGGG ATGTTC TGTC A | CATAGT ATGTTG CAGCCA TTG   |
| VTE1 | GGGAAG TAGGCA TGAGC         | TGTCTT TACAGT CTCCGC A     |
| VTE4 | ATGATA ATAGTG ACATGG TGCC   | TATCCT GAAGAT TGAGGG ATTGG |

- Sterol biosynthesis gene primers

| GENE | FWD PRIMER                    | REV PRIMER                    |
|------|-------------------------------|-------------------------------|
| SQS  | TATAAA CGAGAT ACCTAA GTCTCG C | ATATGT ATCAAA GCATTA GTGACC A |
| SQE  | TCATAA TGGGCG CTTTAT AC       | TGTCTG CAGTTC TCCGT           |
| CAS  | GTAATC AATAAC GATGTC ACCGA    | CCACTT GAAGCA CAAAGA TACT     |
| SMT1 | TGGTCT GAAACC TGGACA          | GTCTAC TCCTGC AAGACG          |
| SMO2 | GAGTAT GCTACT CCATTT GGACTA   | AATGCG CTTCAA CTGTTT          |
| STE1 | ACCTTC ATGCAA CTCATC A        | CAAGAA AGCTAT ATGGGT CCTG     |

- Callose biosynthesis gene primers

| GENE | FWD PRIMER          | REV PRIMER                    |
|------|---------------------|-------------------------------|
| PMR4 | AAGGCG ATAGAA CTCGG | TCCAGA TGGATT AAATAC AAACGG A |

- ROS processing gene primers

| GENE     | FWD PRIMER                 | REV PRIMER                  |
|----------|----------------------------|-----------------------------|
| SOD Cu   | CCACTG TAACTG GAAACA TCT   | GGTGTT CATCCT CAGGAG CA     |
| SOD Mn   | CTGAAG GTGCTG CACTC        | CATGCT CCCAGA CATCAA T      |
| SOD Fe   | ACCATG AATTCT TCTGGG AATC  | CACCCG GAACCA AACTG         |
| CATALASE | TGCAAT CGTGGT TCCTGG TGTTA | GGTGAT TGTTGT GATGAG CACACT |
| APx      | GGTGGT CACACT TTGGG        | GAAGAG CCTTGT CACTCG        |
| NADPHOXD | CATCAC TTCTGC TCCCG        | TTGTTG TTTCCC TGAAAT CCAT   |
| NADPHOXF | GGAAAT GTGCTC ACGTTG       | GAACGC TAAGGT AGTCAT CC     |

- Callose biosynthesis gene primers

| GENE | FWD PRIMER | REV PRIMER |
|------|------------|------------|
|------|------------|------------|

|       |                       |                         |
|-------|-----------------------|-------------------------|
| CALS1 | GCTTCCATGTGGTTCTTAGT  | CTCCCAGCTCTTATTCGC      |
| CALS2 | CCTCTTCCATGTGGTTCTTAG | TTATTTGCAGGCACACCG      |
| CALS3 | AGAGCAAGATAAAGACGACC  | TATTGAGCAGAGATGTTTACAGG |
| CALS4 | CTTACTTCACGGAGGTGC    | GCCCGAAGATTCATAGACGA    |
