# Supplementary material for: Abscisic Acid—Defensive Player in Flax Response to Fusarium culmorum Infection
Source: Molecules. 2022 Apr 29;27(9):2833. doi: 10.3390/molecules27092833 (PMC9105474; doi:10.3390/molecules27092833)
Supplement: Supplementary file 1 [file molecules-27-02833-s001.zip › Supplementary File S3.pdf]

| DXS                   |          | DXR      |          | FPPS     |          | GPPS     |          | HMGR     |          | HMGS     |          | IDI      |          | MVK      |          |          |          |          |          |          |          |          |          |          |
|-----------------------|----------|----------|----------|----------|----------|----------|----------|----------|----------|----------|----------|----------|----------|----------|----------|----------|----------|----------|----------|----------|----------|----------|----------|----------|
| x-fold of the control |          |          |          |          |          |          |          |          |          |          |          |          |          |          |          |          |          |          |          |          |          |          |          |          |
| 6h                    | 0.898482 | 0.078865 | 1.194287 | 0.291636 | 0.649359 | 0.162003 | 1.222801 | 0.09527  | 0.800763 | 0.278749 | 1.159539 | 0.167307 | 0.908801 | 0.424987 | 0.959923 | 0.248682 |          |          |          |          |          |          |          |          |
| 12h                   | 0.65142  | 0.114601 | 2.665787 | 0.776789 | 0.942582 | 0.272886 | 1.094497 | 0.103607 | 1.083155 | 0.157618 | 0.851576 | 0.128477 | 1.601536 | 0.303709 | 1.265483 | 0.234728 |          |          |          |          |          |          |          |          |
| 24h                   | 0.569029 | 0.062943 | 2.492611 | 0.362474 | 0.757737 | 0.055698 | 2.506598 | 0.06121  | 0.908211 | 0.056756 | 0.855756 | 0.035852 | 1.743217 | 0.443787 | 0.960911 | 0.18666  |          |          |          |          |          |          |          |          |
| 36h                   | 0.511336 | 0.11787  | 1.2427   | 0.125516 | 0.233063 | 0.074681 | 2.360127 | 0.399684 | 0.957867 | 0.098746 | 0.748411 | 0.109235 | 2.116138 | 0.477597 | 1.74558  | 0.356701 |          |          |          |          |          |          |          |          |
| 48h                   | 0.805484 | 0.144167 | 3.231821 | 0.742321 | 0.396382 | 0.036457 | 1.518188 | 0.009746 | 1.240218 | 0.130274 | 0.842052 | 0.002321 | 2.359854 | 0.119127 | 1.126042 | 0.47229  |          |          |          |          |          |          |          |          |
| GGR                   |          | GTM      |          | VTE2     |          | VTE3     |          | VTE1     |          | VTE4     |          |          |          |          |          |          |          |          |          |          |          |          |          |          |
| 6h                    | 1.208608 | 0.274309 | 1.555218 | 1.155493 | 0.957492 | 0.155949 | 1.214173 | 0.12493  | 1.10311  | 0.106421 | 0.964944 | 0.145181 |          |          |          |          |          |          |          |          |          |          |          |          |
| 12h                   | 0.94478  | 0.066454 | 1.49859  | 0.163417 | 1.255539 | 0.185293 | 0.737969 | 0.062956 | 1.716009 | 0.103287 | 1.49859  | 0.163417 |          |          |          |          |          |          |          |          |          |          |          |          |
| 24h                   | 0.621297 | 0.033522 | 1.469126 | 0.132867 | 1.546422 | 0.079681 | 1.023019 | 0.112223 | 1.307473 | 0.319874 | 1.469126 | 0.132867 |          |          |          |          |          |          |          |          |          |          |          |          |
| 36h                   | 0.174993 | 0.020328 | 0.622966 | 0.331927 | 0.453257 | 0.111783 | 0.25967  | 0.020015 | 0.948869 | 0.37813  | 0.977707 | 0.046201 |          |          |          |          |          |          |          |          |          |          |          |          |
| 48h                   | 0.874877 | 0.060775 | 0.798376 | 0.688835 | 2.345858 | 0.362268 | 0.727507 | 0.258767 | 1.719471 | 0.053409 | 1.338998 | 0.07572  |          |          |          |          |          |          |          |          |          |          |          |          |
| βHY (CRTZ)            |          | CRTISO   |          | LCYB     |          | LCYE     |          | LUT1     |          | LUT5     |          | PDS      |          | PSY      |          | VDE      |          | ZDS      |          | ZEP      |          | Z-ISO    |          |          |
| 6h                    | 1.312046 | 0.20411  | 0.874207 | 0.239693 | 0.822261 | 0.098814 | 1.457602 | 0.183097 | 1.379587 | 0.207949 | 1.064872 | 0.088638 | 1.119917 | 0.065028 | 1.144904 | 0.187301 | 1.072348 | 0.041391 | 0.765872 | 0.268127 | 0.966842 | 0.134875 | 1.011535 | 0.030398 |
| 12h                   | 2.260227 | 0.231784 | 1.046293 | 0.151253 | 0.658113 | 0.048102 | 0.808957 | 0.140563 | 0.769713 | 0.168501 | 0.896198 | 0.126885 | 1.011497 | 0.055482 | 1.067964 | 0.123596 | 0.767465 | 0.147702 | 1.552894 | 0.144521 | 0.868358 | 0.152995 | 1.652846 | 0.055622 |
| 24h                   | 2.098966 | 0.184076 | 1.781907 | 0.208362 | 0.542171 | 0.075754 | 0.622145 | 0.103811 | 1.121898 | 0.289449 | 0.725935 | 0.030902 | 0.887958 | 0.170345 | 2.743568 | 0.262471 | 0.905394 | 0.0667   | 0.990279 | 0.071589 | 0.795829 | 0.156514 | 1.250586 | 0.166522 |
| 36h                   | 3.64055  | 0.335893 | 2.371574 | 0.373451 | 0.31433  | 0.030225 | 0.267775 | 0.038703 | 0.456049 | 0.061308 | 0.384792 | 0.035464 | 0.459226 | 0.045679 | 0.943052 | 0.295944 | 1.084375 | 0.099775 | 0.536302 | 0.075832 | 0.516577 | 0.075873 | 1.20184  | 0.278602 |
| 48h                   | 3.878237 | 0.344359 | 2.711182 | 0.417605 | 1.216699 | 0.342313 | 0.658706 | 0.020965 | 1.46163  | 0.256332 | 1.377137 | 0.004477 | 1.158354 | 0.175595 | 3.633638 | 0.35349  | 0.795601 | 0.13374  | 1.755972 | 0.14202  | 0.836213 | 0.034734 | 3.024133 | 0.724303 |
| ABA2                  |          | AAO3     |          | CCD1     |          | CCD7     |          | CCD8     |          | NCED3    |          | NCED6    |          |          |          |          |          |          |          |          |          |          |          |          |
| 6h                    | 0.969875 | 0.119972 | 0.862999 | 0.09684  | 0.94658  | 0.163332 | 0.574386 | 0.066009 | 0.583631 | 0.042149 | 2.752706 | 0.936036 | 3.302669 | 0.688377 |          |          |          |          |          |          |          |          |          |          |
| 12h                   | 0.741645 | 0.049394 | 2.018131 | 0.188476 | 0.803078 | 0.081582 | 0.287193 | 0.009969 | 0.614303 | 0.038674 | 4.590688 | 0.234614 | 8.231913 | 3.288739 |          |          |          |          |          |          |          |          |          |          |
| 24h                   | 0.6558   | 0.049676 | 1.940416 | 0.182607 | 0.857013 | 0.093828 | 0.222597 | 0.010524 | 0.420911 | 0.05569  | 5.253014 | 0.55043  | 6.293971 | 1.363887 |          |          |          |          |          |          |          |          |          |          |
| 36h                   | 0.634404 | 0.184088 | 3.792924 | 0.09264  | 0.974946 | 0.102428 | 0.132434 | 0.061148 | 0.600531 | 0.033229 | 10.89347 | 1.320234 | 22.66279 | 4.109993 |          |          |          |          |          |          |          |          |          |          |
| 48h                   | 0.972278 | 0.218786 | 2.268457 | 0.109596 | 0.929402 | 0.111424 | 0.174876 | 0.049155 | 0.422385 | 0.048667 | 8.650118 | 1.235515 | 12.73505 | 1.949512 |          |          |          |          |          |          |          |          |          |          |
| CAS                   |          | SMO2     |          | SMT1     |          | SMT2     |          | SQE      |          | SQS      |          | STE1     |          | P450     |          | SQE      |          |          |          |          |          |          |          |          |
| 6h                    | 0.856084 | 0.076259 | 0.797881 | 0.057354 | 0.756517 | 0.169961 | 1.006213 | 0.161888 | 0.651423 | 0.068175 | 0.634298 | 0.340720 | 0.042553 | 0.002128 | 1.215637 | 0.368946 | 0.651423 | 0.068175 |          |          |          |          |          |          |
| 12h                   | 1.301082 | 0.283951 | 0.745663 | 0.053861 | 0.762196 | 0.207075 | 1.085407 | 0.20262  | 0.68014  | 0.124337 | 0.704187 | 0.303044 | 1.718223 | 0.207548 | 2.835273 | 0.396416 | 0.68014  | 0.124337 |          |          |          |          |          |          |
| 24h                   | 0.497868 | 0.038232 | 0.603737 | 0.079889 | 0.707403 | 0.09233  | 1.490243 | 0.303967 | 0.573634 | 0.113558 | 0.240908 | 0.019170 | 0.601124 | 0.058018 | 2.700975 | 0.526508 | 0.573634 | 0.113558 |          |          |          |          |          |          |
| 36h                   | 0.434405 | 0.054497 | 0.423436 | 0.039288 | 0.383769 | 0.029693 | 0.725053 | 0.085243 | 0.628123 | 0.086576 | 0.587492 | 0.111777 | 0.728061 | 0.313035 | 2.098659 | 0.039926 | 0.628123 | 0.086576 |          |          |          |          |          |          |
| 48h                   | 0.548824 | 0.097846 | 0.361779 | 0.021205 | 0.687624 | 0.150986 | 0.738853 | 0.037534 | 0.577615 | 0.019446 | 0.724714 | 0.201150 | 1.066391 | 0.056669 | 9.1234   | 1.75472  | 0.577615 | 0.019446 |          |          |          |          |          |          |

Supplementary File S3. RQs of terpenoid pathway biosynthesis genes (means and sd (in gray)).
