# Supplementary material for: Abscisic Acid—Defensive Player in Flax Response to Fusarium culmorum Infection
Source: Molecules. 2022 Apr 29;27(9):2833. doi: 10.3390/molecules27092833 (PMC9105474; doi:10.3390/molecules27092833)
Supplement: Supplementary file 1 [file molecules-27-02833-s001.zip › Supplementary File S4.pdf]

x-fold of the  
control

|                     | 6h       | 12h      | 24h      | 36h      | 48h      |
|---------------------|----------|----------|----------|----------|----------|
| squalene            | 0.880319 | 0.883879 | 0.333929 | 2.095436 | 1.409887 |
| campesterol         | 0.81505  | 1.128253 | 0.973257 | 1.041506 | 1.077503 |
| stigmasterol        | 0.74599  | 0.899437 | 0.934694 | 1.078362 | 1.058983 |
| $\beta$ -sitosterol | 0.81714  | 1.055712 | 1.006616 | 1.060432 | 1.088588 |
| sitostanol          | 0.569806 | 0.944616 | 1.172846 | 1.107517 | 0.990092 |
| avenasterol         | 0.569567 | 0.823506 | 1.167515 | 1.098648 | 1.36974  |
| neoxanthin          | 0.827756 | 1.15842  | 1.084446 | 1.069807 | 0.842089 |
| violaxanthin        | 0.838569 | 1.240807 | 1.101486 | 1.087136 | 0.903072 |
| lutein              | 0.85406  | 1.150562 | 1.089812 | 1.067631 | 0.86999  |
| chlorophyll b       | 0.862415 | 1.13238  | 1.080505 | 1.027036 | 0.854174 |
| chlorophyll a       | 0.863798 | 1.174329 | 1.063973 | 1.004485 | 0.828228 |
| $\beta$ -carotene   | 0.87255  | 1.226519 | 1.073992 | 0.986127 | 0.905171 |
| tocopherol          | 0.868726 | 1.171854 | 1.112807 | 1.017141 | 0.978179 |
| ABA                 | 3.373088 | 7.599848 | 5.845432 | 4.944583 | 6.720674 |

Supplementary File S4. Levels of the terpenoid metabolites in flax after *F. culmorum* infection (x-fold of the control).
