# Supplementary material for: Abscisic Acid—Defensive Player in Flax Response to Fusarium culmorum Infection
Source: Molecules. 2022 Apr 29;27(9):2833. doi: 10.3390/molecules27092833 (PMC9105474; doi:10.3390/molecules27092833)
Supplement: Supplementary file 1 [file molecules-27-02833-s001.zip › Supplementary File S5.pdf]

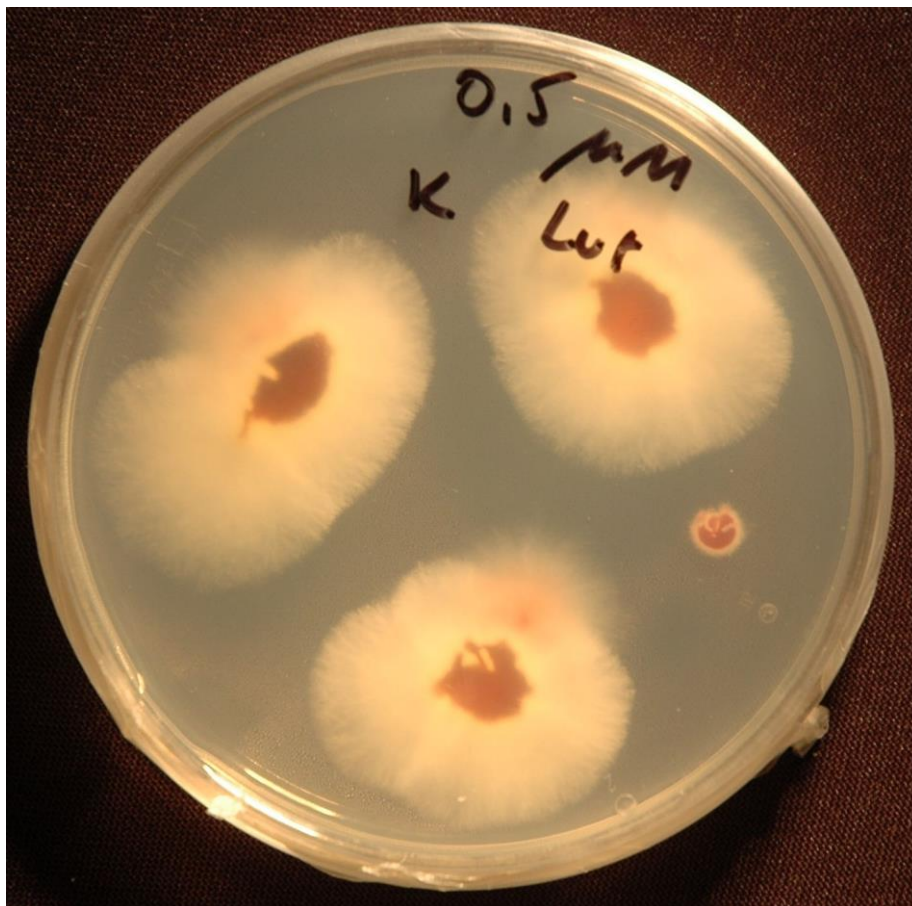

*F. culmorum* – control (for carotenoids)

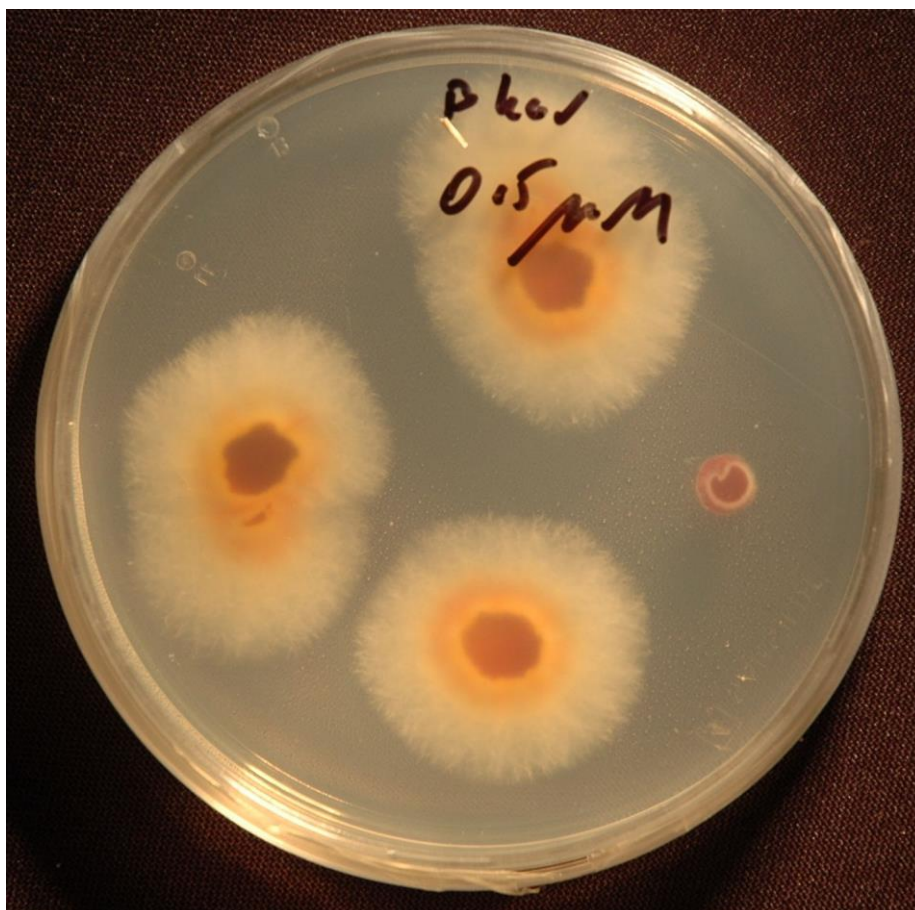

*F. culmorum* + 0.5 μM β-carotene

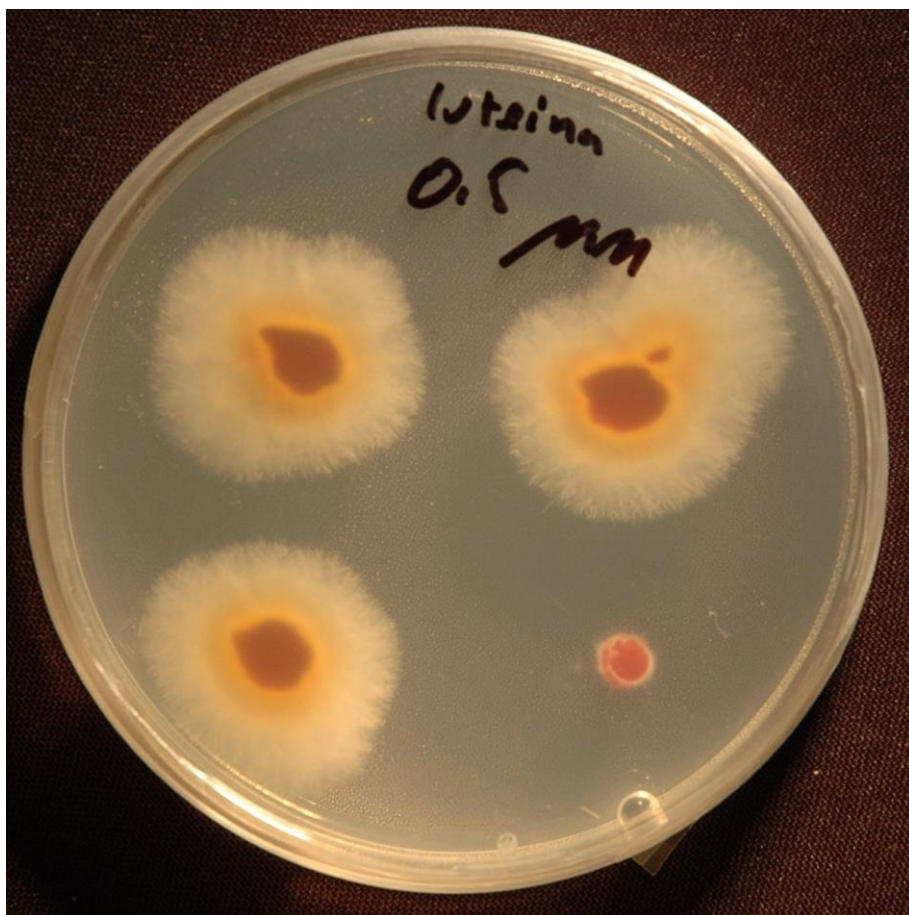

*F. culmorum* + 0.5  $\mu$ M lutein

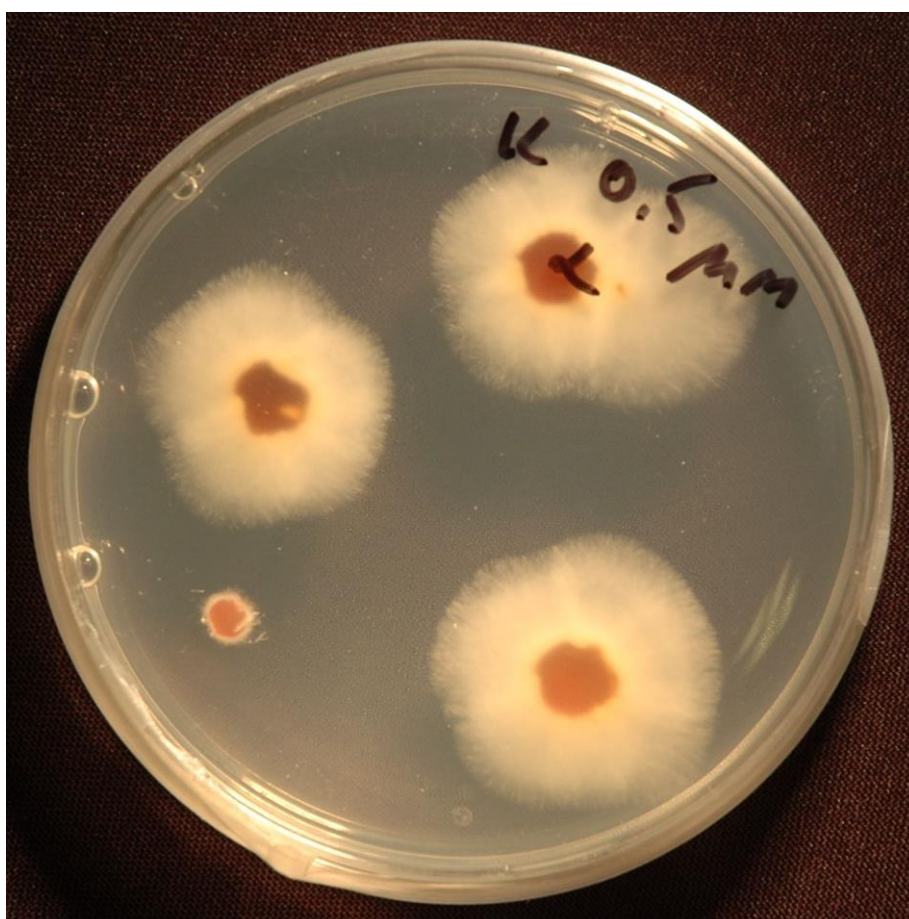

*F. culmorum* – control (for tocopherols)

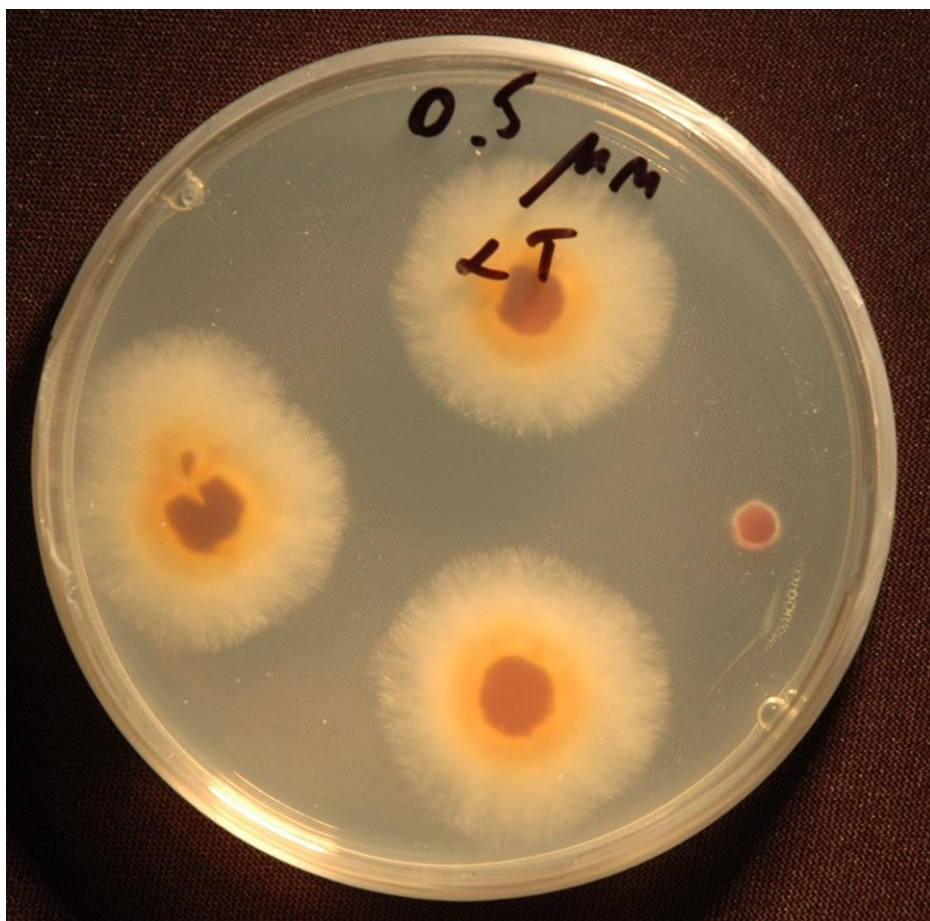

*F. culmorum* + 0.5  $\mu$ M  $\alpha$ -tocopherol

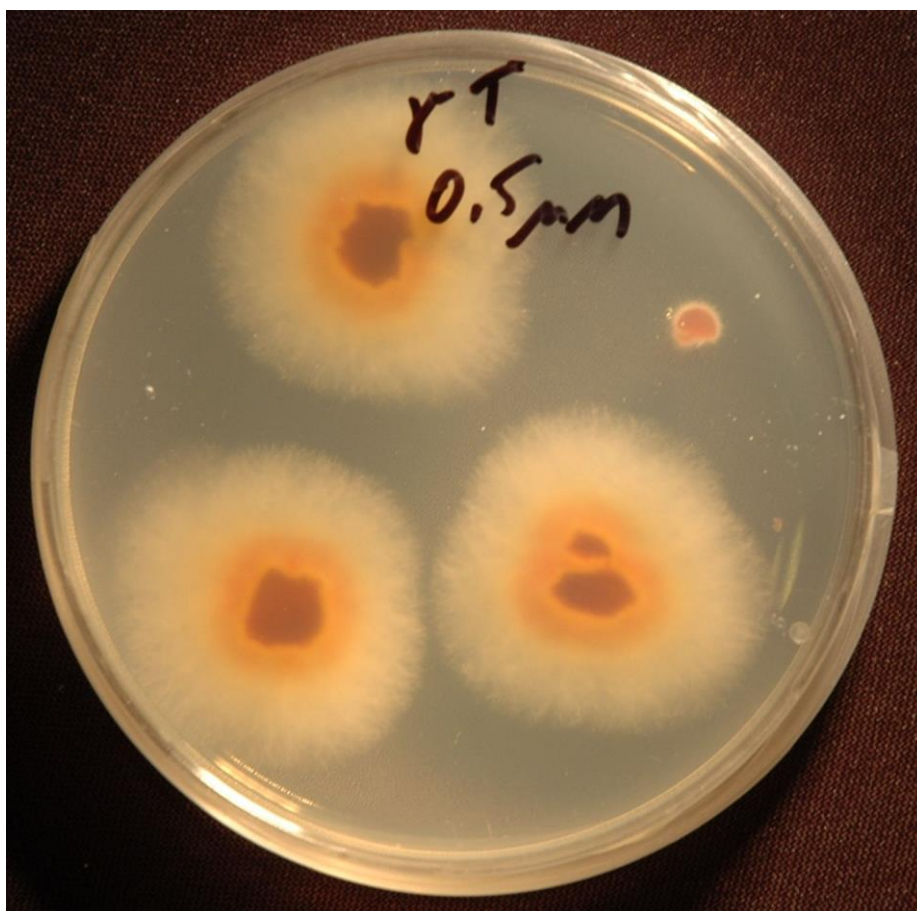

*F. culmorum* + 0.5  $\mu$ M  $\gamma$ -tocopherol
