# Supplementary material for: Abscisic Acid—Defensive Player in Flax Response to Fusarium culmorum Infection
Source: Molecules. 2022 Apr 29;27(9):2833. doi: 10.3390/molecules27092833 (PMC9105474; doi:10.3390/molecules27092833)
Supplement: Supplementary file 1 [file molecules-27-02833-s001.zip › Supplementary File S6.pdf]

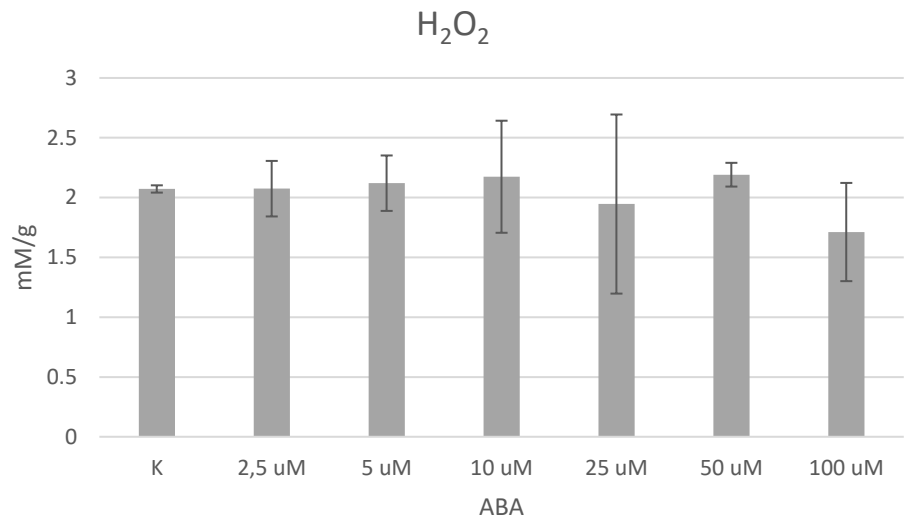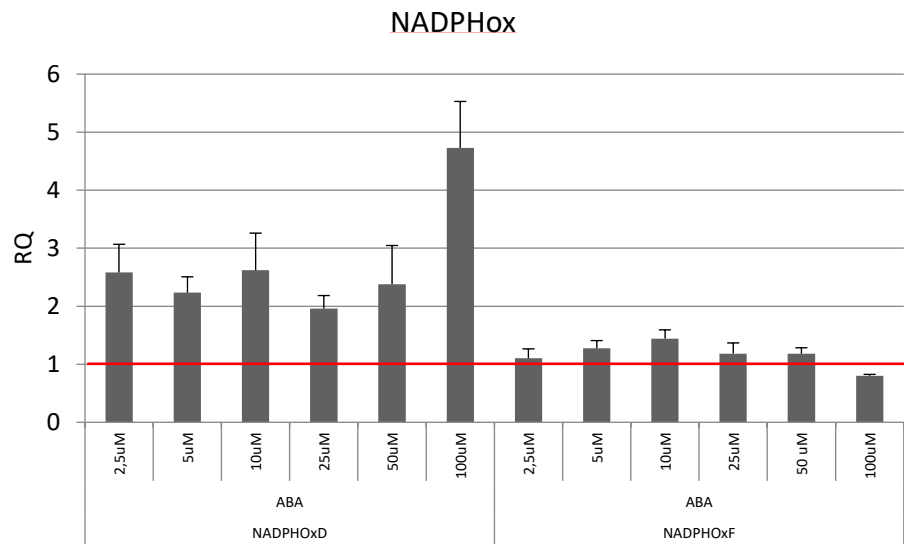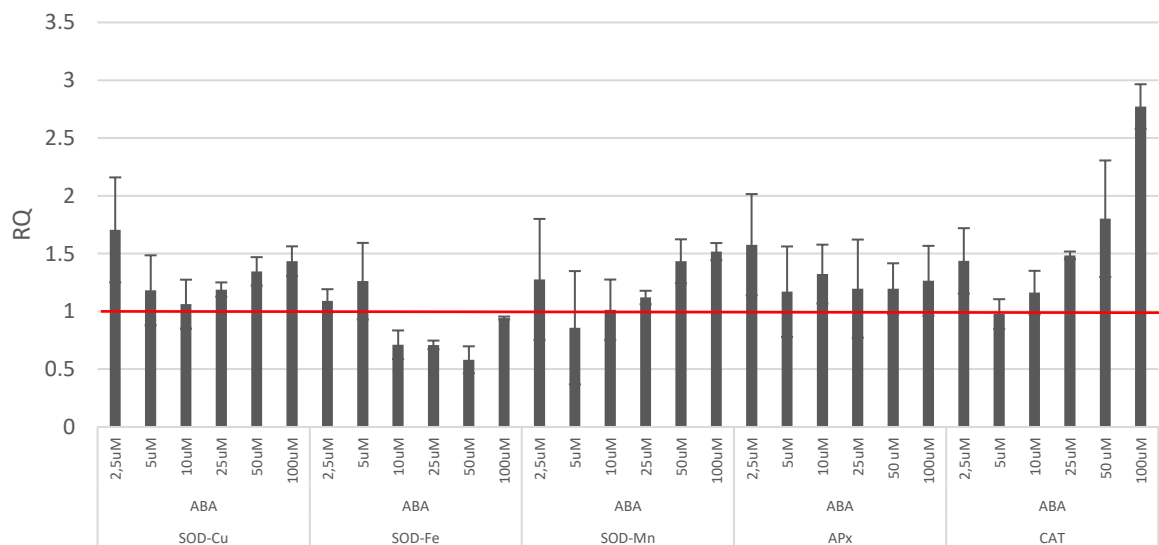

Supplementary File S6. The content of  $\text{H}_2\text{O}_2$  in flax seedlings sprayed with different concentrations of ABA (A); transcript levels of NADPHOxD and NADPHOxF in flax seedlings sprayed with different concentrations of ABA presented as relative quantification (RQ) compared to control (RQ = 1 marked with red line) with actin used as reference gene (B); transcript levels of superoxide dismutase (SOD-Cu, SOD-Fe, SOD-Mn), ascorbate peroxidase (APx) and catalase (CAT) genes in flax seedlings sprayed with different concentrations of ABA presented as relative quantification (RQ) compared to control (RQ = 1 marked with red line) with actin used as reference gene (C).
